# Supplementary material for: Understanding Solid Electrolyte Interphase Nucleation and Growth on Lithium Metal Surfaces
Source: MDPI journal article supplement (doi:10.3390/batteries7040073), 2021-11-02
Supplement: s1 [file s1]

Supplemental Information

# Understanding Solid Electrolyte Interphase Nucleation and Growth on Lithium Metal Surfaces

Stefany Angarita-Gomez and Perla B. Balbuena \*

Department of Chemical Engineering, Texas A&M University, College Station, TX 77843, USA; mariste\_9428@tamu.edu

\* Correspondence: balbuena@tamu.edu

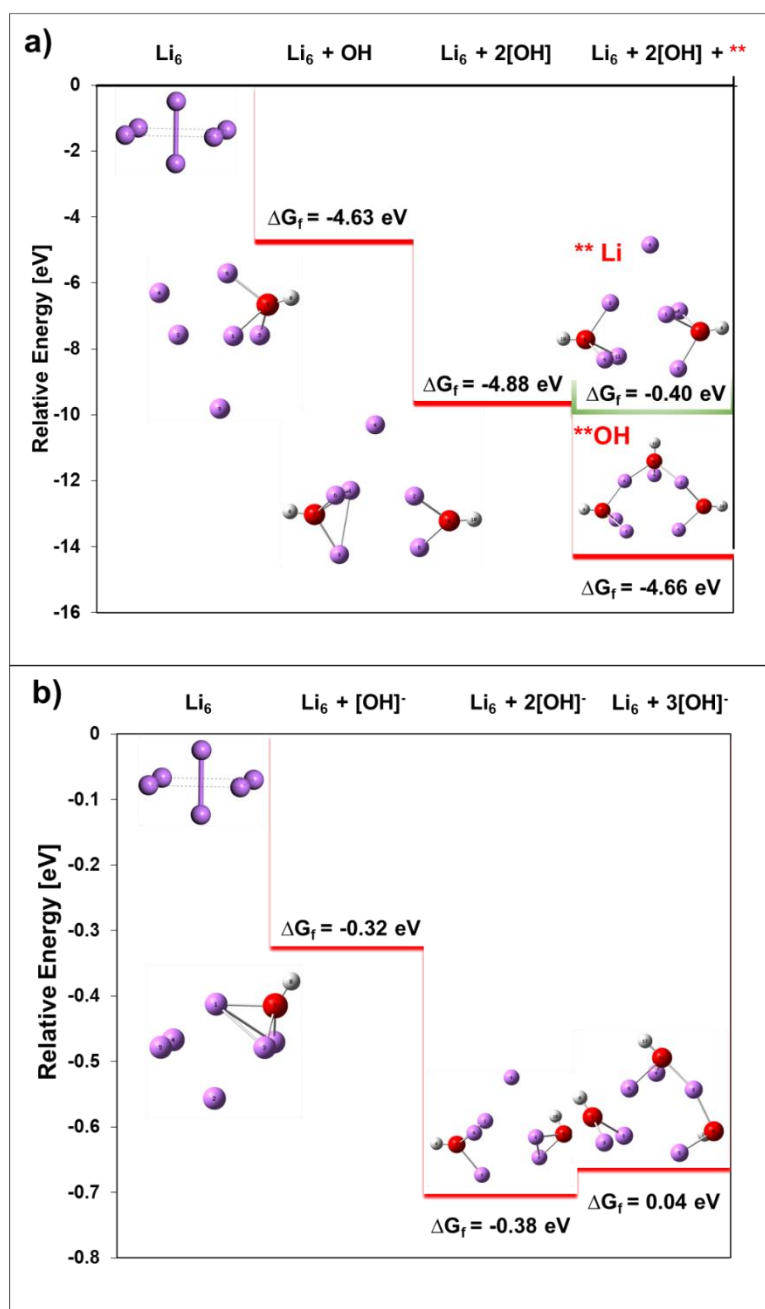

**Figure S1.** Relative Gibbs Free Energy of Formation for LiOH fragmental growth mechanism. (a) Sequential addition of OH while maintaining the total net charge of the cluster equal to zero. (b) Every OH added to the cluster includes the addition of 1 electron to the calculation.

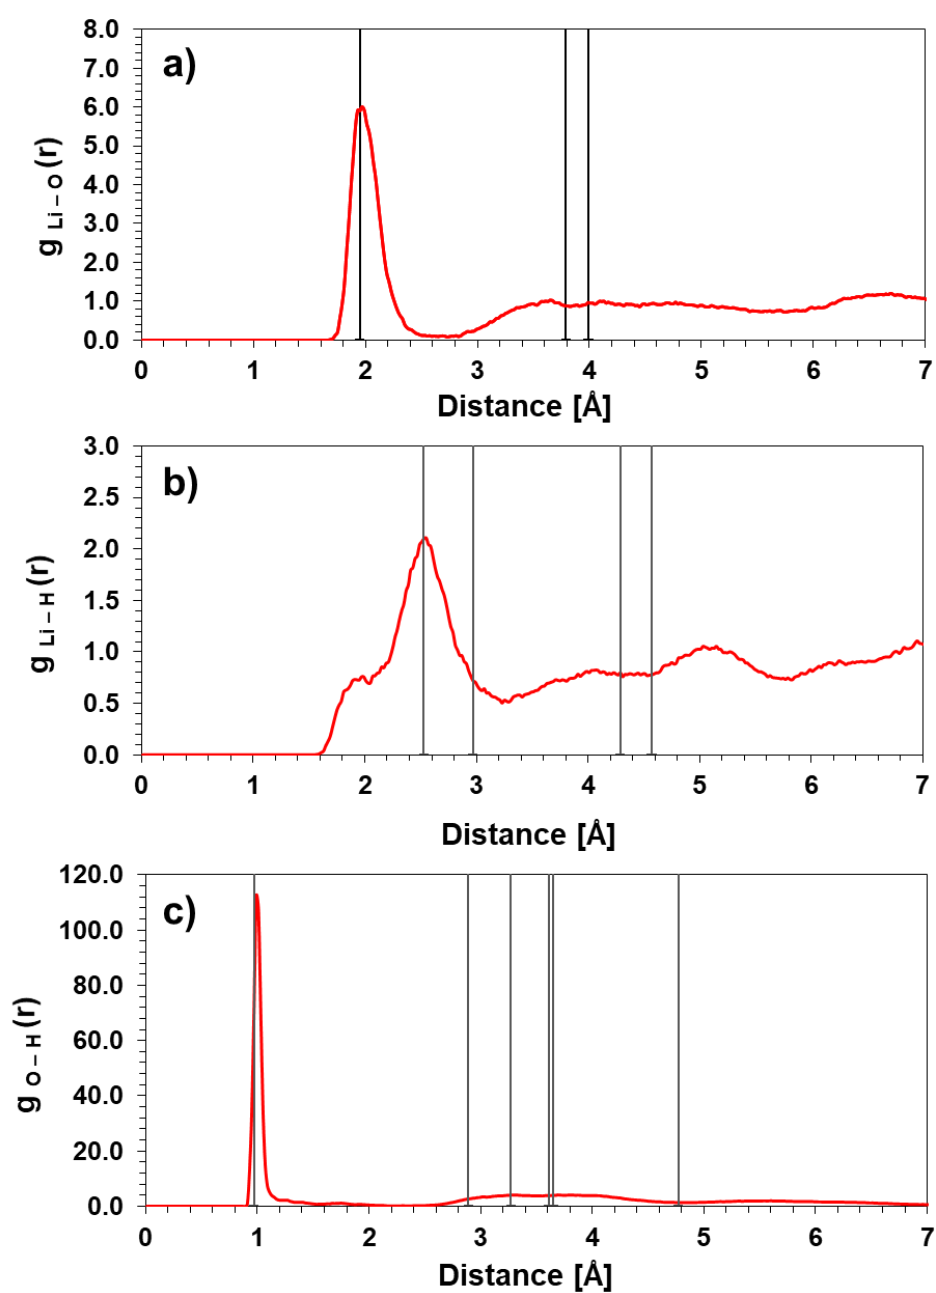

**Figure S2.** Radial distribution function comparison of crystalline structure of LiOH (black vertical lines) and LiOH AIMD structure after cooling (red curve). (a) Distance between Lithium and Oxygen atoms. (b) Distance between Lithium and Hydrogen atoms. (c) Distance between Oxygen and Hydrogen atoms.

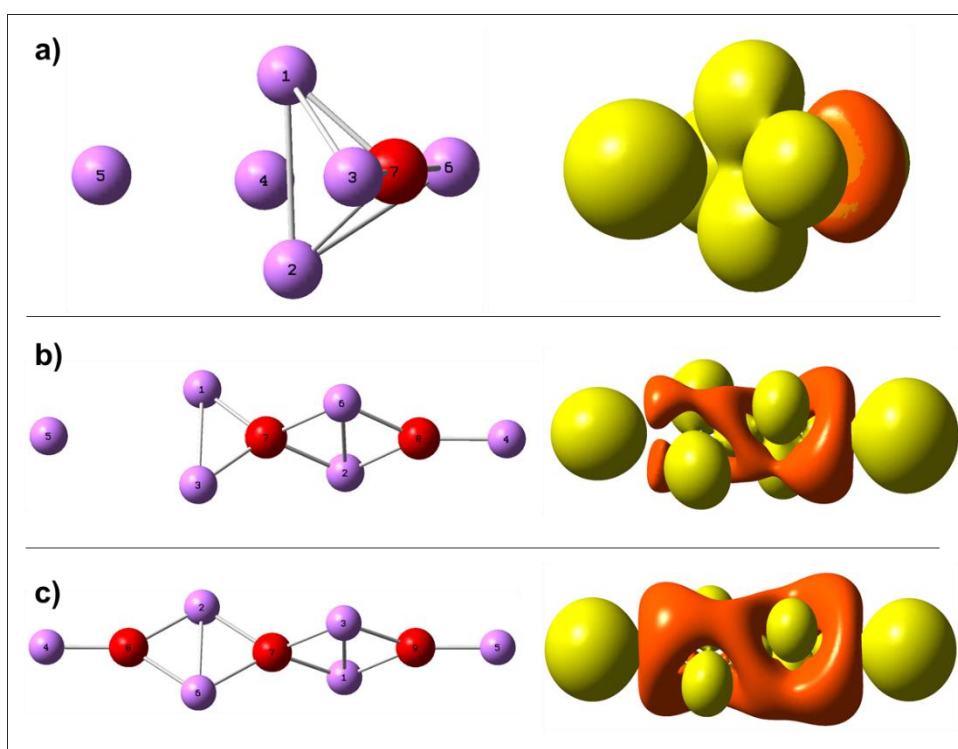

**Figure S3.** Optimized SEI nanoclusters of  $\text{Li}_2\text{O}$ , structure (left) and corresponding ESP (right). (a)  $\text{Li}_6$  cluster with first addition of Oxygen atom; (b) second addition of Oxygen to structure in (a); (c) Third addition of Oxygen to structure in (b). Isosurface value of 0.03 a.u. Orange is negative and yellow is positive.

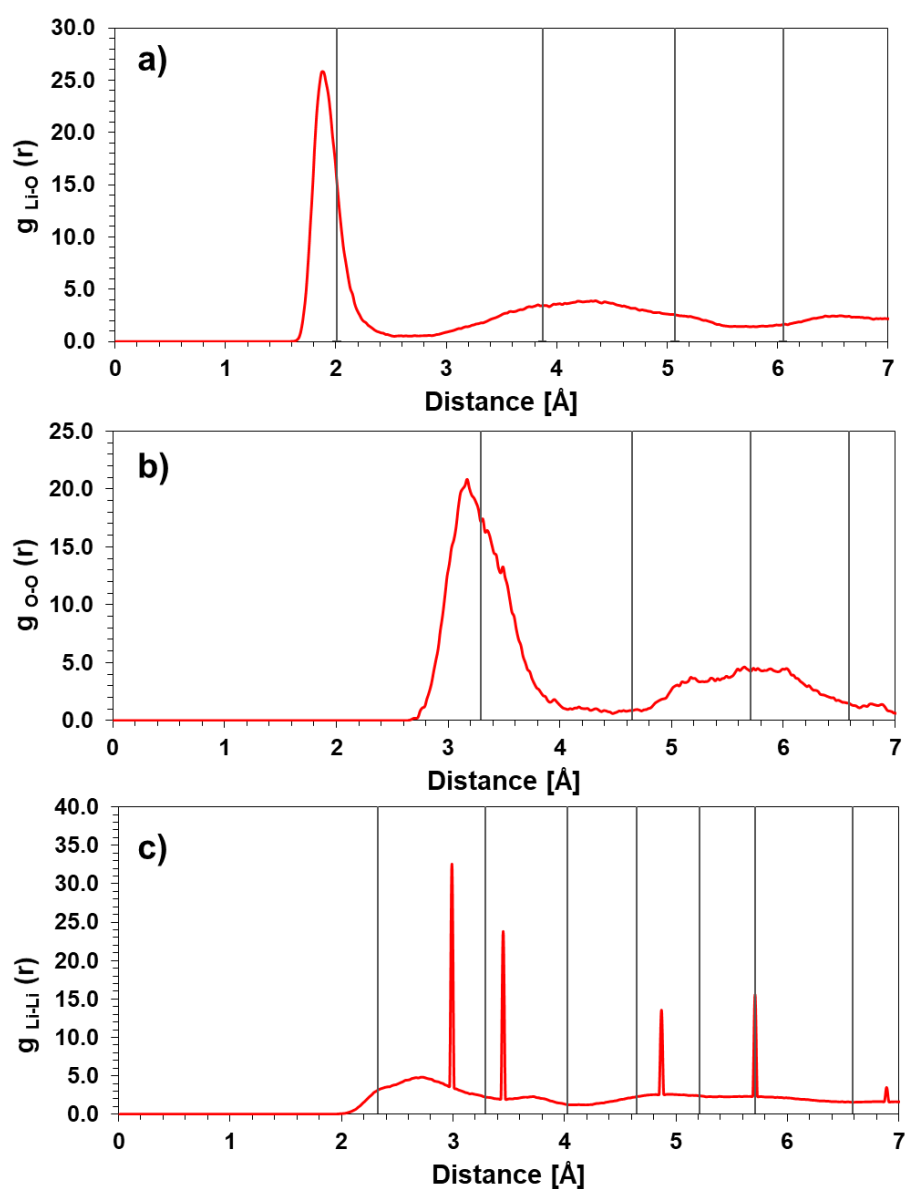

**Figure S4.** Radial distribution function comparison of Li<sub>2</sub>O crystalline structure (black vertical lines) and Li<sub>2</sub>O AIMD structure after cooling (red curve). (a) Distance between Lithium and Oxygen atoms. (b) Distance between Oxygen atoms. (c) Distance between Lithium atoms.
